# Supplementary material
Source: PubMed Central journal article supplement (PMC3396588)
Supplement: NIHMS389103-supplement-Supplementary_Data.pdf [file NIHMS389103-supplement-Supplementary_Data.pdf]

# Supplementary Material for: Reverse engineering the human islet amyloid polypeptide aggregation pathway

J Bailey<sup>1</sup>, KJ Potter<sup>2</sup>, B Verchere<sup>2</sup>, L Edelstein-Keshet<sup>1</sup> and D Coombs<sup>1,\*</sup>

<sup>1</sup>Department of Mathematics and Institute of Applied Mathematics, University of British Columbia, Vancouver, British Columbia V6T 1Z2, Canada.

<sup>2</sup>Department of Pathology and Laboratory Medicine, University of British Columbia and British Columbia's Childrens Hospital, Vancouver, Canada

E-mail: coombs@math.ubc.ca

## 1. Analysis of alternative models

Here we analyze the models of Lee et al. [1] and Powers and Powers [2] and rule them out, based on similar methods of analysis and scaling to those shown in the main text.

### 1.1. The Three-Stage Kinetic Model of Amyloid Fibrillation

Here we show that the model proposed by Lee et al. [1] (abbreviated TSKM in the Supplementary Tables) reduces to our previous NDP model with an arbitrarily assumed value  $\gamma = 1$ . Supplementary Figure 2 shows a schematic of the proposed model for the species of interest. Here  $F(t)$  denotes the fibril number concentration (which is equivalent to the number of fibril tips). It is assumed that fibrils can elongate via addition of any oligomer. This leads to a term of the form  $\sum_{j=1}^k l_j p_j F$ . The new variable  $F(t)$  is actually quite similar to the variable  $\nu(t)$ , i.e. the number of nuclei formed in the previous NDP model. We extend the assumption that negligible monomer mass is contained in oligomers and nuclei to now include the shortest of fibrils, those containing a nucleus and 1 additional monomer. (The need to include these shortest fibers in the negligible mass pool assumption stems from the constraint that a fibril may only form by the addition of a monomer to a nucleus.) Using conventions as in [1], with rates of attachment and detachment for the  $i$ th oligomers to fibrils  $l_i$ , and  $s_i$  respectively leads to the following differential equations

$$\frac{dc}{dt} = -f_{k+1}cF + s_oF, \quad (1)$$

$$\frac{dp_1}{dt} = f_0c^2 - f_1p_1c + b_2p_2 - b_1p_1 + s_1F - l_1p_1F, \quad (2)$$

$$\frac{dp_i}{dt} = f_{i-1}p_{i-1}c - f_i p_i c + b_{i+1}p_{i+1} - b_i p_i + s_i F - l_i p_i F \quad (2 \leq i < k), \quad (3)$$

$$\frac{dp_k}{dt} = f_{k-1}p_{k-1}c - f_k p_k c + b_{k+1}F - b_k p_k + s_k F - l_k p_k F, \quad (4)$$

$$\frac{dF}{dt} = f_k p_k c - b_{k+1}F, \quad (5)$$

$$\frac{dM}{dt} = f_{k+1}cF + \sum_{j=1}^k l_j p_j F - \sum_{j=0}^k s_j F - b_{k+1}F. \quad (6)$$

Observe the new terms  $s_i F$  and  $l_i p_i F$  in oligomer equations representing the new feature that oligomers of various sizes can attach and detach from fibrils. Further note that this model arbitrarily assumes that  $n_0 = 2$  and  $n_1 = 1$ , whereas we obtain values for these integers directly from the data.

Systematic scaling of this model is accomplished by setting

$$\hat{t} = \frac{t}{\lambda c_o^{-\gamma}}, \quad \hat{c} = \frac{c}{c_0}, \quad \hat{F} = \frac{F}{\mu}, \quad \hat{M} = \frac{M}{c_0}, \quad \text{and } \hat{c}_i = \frac{p_i}{X}, \quad \text{for } 2 \leq i \leq k$$

where  $\lambda$  is needed to keep the units correct, and  $X, \mu$  are quantities to be determined by the system. Substituting the above into the model and dropping the hats gives

$$\frac{dc}{dt} = \frac{\lambda c_o^{-\gamma}}{c_0} [-f_{k+1} c c_0 F \mu + s_o F \mu], \quad (7)$$

$$\begin{aligned} \frac{dp_1}{dt} = \frac{\lambda c_o^{-\gamma}}{X} [f_0 c^2 c_0^2 - f_1 p_1 X c c_0 + b_2 p_2 X - b_1 p_1 X \\ + s_1 F \mu - l_1 p_1 X F \mu], \end{aligned} \quad (8)$$

$$\begin{aligned} \frac{dp_i}{dt} = \frac{\lambda c_o^{-\gamma}}{X} [f_{i-1} p_{i-1} X c c_0 - f_i p_i X c c_0 + b_{i+1} p_{i+1} X \\ - b_i p_i X + s_i F \mu - l_i p_i X F \mu] \quad \text{for } 2 \leq i \leq k, \end{aligned} \quad (9)$$

$$\begin{aligned} \frac{dp_k}{dt} = \frac{\lambda c_o^{-\gamma}}{X} [f_{k-1} p_{k-1} X c c_0 - f_k p_k X c c_0 + b_{k+1} F \mu \\ - b_k p_k X + s_k F \mu - l_k p_k X F \mu], \end{aligned} \quad (10)$$

$$\frac{dF}{dt} = \frac{\lambda c_o^{-\gamma}}{\mu} [f_k p_k X c c_0 - b_{k+1} F \mu], \quad (11)$$

$$\frac{dM}{dt} = \frac{\lambda c_o^{-\gamma}}{c_0} [f_{k+1} c c_0 F \mu + \sum_{j=1}^k l_j p_j X F \mu - \sum_{j=0}^k s_j F \mu - b_{k+1} F \mu]. \quad (12)$$

We now attempt to remove all explicit dependence of the model on  $c_0$ . Inspection of the equations for the change in fibril end density and mass imply that the term  $f_k p_k X c c_0$  must survive or no fibrils will ever form. Therefore, we set  $X = c_o^\gamma$ , and  $\mu = X$ . Other terms must drop out as in the previous example. In the resulting equations, we set  $\gamma = 1$  and absorb  $\lambda$  into the reaction rates. The resulting equations are

$$\frac{dc}{dt} = -f_{k+1} c F, \quad (13)$$

$$\frac{dp_1}{dt} = f_0 c^2 - f_1 c p_1 - l_1 p_1 F, \quad (14)$$

$$\frac{dp_i}{dt} = f_{i-1} c p_{i-1} - f_i c p_i - l_i p_i F, \quad \text{for } 2 \leq i \leq k-1 \quad (15)$$

$$\frac{dp_k}{dt} = f_k p_{k-1} c - f_k p_k c - l_k p_k F, \quad (16)$$

$$\frac{dF}{dt} = f_k p_k c, \quad (17)$$

$$\frac{dM}{dt} = f_{k+1} c F + \sum_{j=1}^k l_j p_j F. \quad (18)$$

Elongation kinetics suggest that fibril growth is mediated by monomer addition implying  $l_i p_i F = 0$ , for  $1 \leq i \leq k$ . Furthermore, the persistent population of oligomers observed experimentally cannot be established if the elongation terms for oligomeric species are not absent, or trivially small. The model now becomes

$$\frac{dc}{dt} = -f_{k+1} c F, \quad (19)$$

$$\frac{dp_1}{dt} = f_0 c^2 - f_1 c p_1, \quad (20)$$

$$\frac{dp_i}{dt} = f_{i-1} c p_{i-1} - f_i c p_i, \quad (21)$$

$$\frac{dp_k}{dt} = f_{k-1} p_{k-1} c - f_k p_k c, \quad (22)$$

$$\frac{dF}{dt} = f_k p_k c, \quad (23)$$

$$\frac{dM}{dt} = f_{k+1} c F \approx -\frac{dc}{dt}. \quad (24)$$

Therefore, the model as proposed in [1] results in a special case of the generic NDP model from the view of collapsible data and persistent oligomer populations, or elongation kinetics. Removing the condition that only one monomer may join other monomers or oligomers to form the next oligomeric species, thus allowing the formation of each oligomeric species through any number of additional monomer units results in the NDP model

$$\frac{dp_1}{dt} = f_0 c^{2\gamma} - f_1 c^\gamma p_1, \quad (25)$$

$$\frac{dp_i}{dt} = f_{i-1} c^\gamma p_{i-1} - f_i c^\gamma p_i, \quad (26)$$

$$\frac{dp_k}{dt} = f_{k-1} p_{k-1} c^\gamma - f_k p_k c, \quad (27)$$

$$\frac{dF}{dt} = f_k p_k c^\gamma, \quad (28)$$

$$\frac{dM}{dt} = f_{k+1} c F = -\frac{dc}{dt}. \quad (29)$$

Thus, the ‘‘Three-Stage Kinetic Model of Amyloid Fibrillation’’ reduces to the NDP model, under the systematic scaling and elongation kinetics implied by our data.

### 1.2. Off-Pathway Kinetics for Aggregate Formation

Powers and Powers [2] proposed an NDP model with a competing off-pathway branch that produces other types of aggregates (represented by the variables  $z_i$ ). We abbreviate

this model by the initials OPK in the Supplementary Tables. The assumptions made for the basic NDP model apply here but the authors assumed what amounts to an arbitrary scaling  $t_0 \propto A_\infty^{-\gamma}$ , for  $\gamma = 1$ .

With terminology summarized in Supplementary Tables 2 and 3, the model equations are:

$$\frac{dp_1}{dt} = f_0c^2 - f_1cp_1 + b_2p_2 - b_1p_1, \quad (30)$$

$$\frac{dp_i}{dt} = f_{i-1}cp_{i-1} - f_i cp_i - b_i p_i + b_{i+1}p_{i+1}, \quad \text{for } 2 \leq i \leq k, \quad (31)$$

$$\frac{dz_1}{dt} = \alpha_0c^2 - \alpha_1z_1c + \beta_2z_2 - \beta_1z_1, \quad (32)$$

$$\frac{dz_i}{dt} = \alpha_{i-1}z_{i-1}c - \alpha_i z_i c - \beta_i z_i + \beta_{i+1}z_{i+1}, \quad \text{for } 2 \leq i \leq m-1, \quad (33)$$

$$\frac{dz_m}{dt} = \alpha_{m-1}z_{m-1}c - \beta_m z_m, \quad (34)$$

$$\frac{d\nu}{dt} = f_k c^{n_k} p_k - b_\nu \nu, \quad (35)$$

$$\frac{dM}{dt} = f_{k+1}c\nu - b_M \nu. \quad (36)$$

We now introduce the additional scaled variable  $\hat{z}_i = z_i/Y$  for  $1 \leq i \leq m$ , where  $Y$  is to be determined. Substituting the scaling variables into the model and dropping the hats gives

$$\frac{dp_1}{dt} = \lambda[f_0c^2 - f_1p_1c], \quad (37)$$

$$\frac{dp_i}{dt} = \lambda[f_{i-1}p_{i-1}c - f_i p_i c c], \quad \text{for } 2 \leq i \leq k, \quad (38)$$

$$\frac{d\nu}{dt} = \lambda[f_k p_k c], \quad (39)$$

$$\frac{dM}{dt} = \lambda[f_{k+1}\nu c], \quad (40)$$

$$\frac{dz_1}{dt} = \lambda[\alpha_0c^2 - \alpha_1z_1c], \quad (41)$$

$$\frac{dz_i}{dt} = \lambda[\alpha_{i-1}z_{i-1}c - \alpha_i z_i c] \quad \text{for } 2 \leq i \leq m-1, \quad (42)$$

$$\frac{dz_m}{dt} = \lambda[\alpha_{m-1}z_{m-1}c]. \quad (43)$$

We find, given our data constraints, that this model reduces to the NDP model where aggregates of the same monomeric size as oligomers are produced. Furthermore, these aggregate populations are ever increasing, and given that no ‘‘bottleneck’’ of nucleation exist along the aggregate pathway, it is likely that such aggregation events would effectively compete for monomers, especially during early stages of fibrillogenesis. The result is a notable mass of monomers being sequestered into aggregates (a prediction not supported by our experimental data). This would contradict our assumption that most of the mass is concentrated in either the fibril or the monomer pools during the

fibril formation process. This model may be easily modified in such a way that allows for any scaling of  $\gamma$ . However, the observation that the off-pathway aggregates will be of the same size in monomer units as the persistent oligomer population will hold, except perhaps for the smallest aggregate species.

- [1] Chuang-Chung Lee, Arpan Nayak, Ananthakrishnan Sethuraman, Georges Belfort, and Gregory J McRae. A three-stage kinetic model of amyloid fibrillation. *Biophys J*, 92(10):3448–3458, May 2007.
- [2] Evan T Powers and David L Powers. Mechanisms of protein fibril formation: nucleated polymerization with competing off-pathway aggregation. *Biophys J*, 94(2):379–391, Jan 2008.

## 2. Supplementary Tables

**Supplementary Table 1.** Estimating the number of steps in the nucleation pathway. As described in the main text, we generated log-log plots of the fluorescence  $A(t)$  versus time, for times between 5% and 30% of the asymptotic fluorescence. The slope of the best-fit linear function is our estimate of  $k + 2$  where  $k$  is the number of steps in the pathway to nucleation. Here we give the estimates of  $k$  for each experiment with at least 4 data points in the time range considered, and the  $R^2$  (coefficient of determination), a measure of the goodness of the linear fit.

| Initial concentration ( $\mu\text{M}$ ) | Estimated $k$ | No. of data points | $R^2$ statistic |
|-----------------------------------------|---------------|--------------------|-----------------|
| 30                                      | 10.4          | 8                  | 0.88            |
| 35                                      | 8.9           | 11                 | 0.99            |
| 40                                      | 6.3           | 17                 | 0.98            |
| 45                                      | 7.9           | 9                  | 0.98            |
| 50                                      | 7.3           | 10                 | 0.93            |
| 55                                      | 8.2           | 8                  | 0.90            |
| 60                                      | 8.2           | 8                  | 0.90            |
| 65                                      | 7.0           | 7                  | 0.91            |
| 70                                      | 9.7           | 4                  | 0.99            |
| 75                                      | 7.7           | 5                  | 0.99            |
| 80                                      | 7.7           | 5                  | 0.99            |

**Supplementary Table 2.** Variables and their meanings in the various models. Abbreviations: NDP, nucleation dependent polymerization; FDSN, fibril-dependent secondary nucleation; TSKM, three-stage kinetic model; OPK, nucleation dependent model with off-pathway kinetics.

| Variable | meaning                                                           | model |
|----------|-------------------------------------------------------------------|-------|
| $c(t)$   | IAPP monomer concentration                                        | all   |
| $p_i(t)$ | number concentration of the $i$ th oligomer ( $i = 1 \dots k$ )   | all   |
| $\nu(t)$ | number concentration of nuclei                                    | NDP   |
| $M(t)$   | monomer mass in fibril, excluding monomers in oligomer and nuclei | NDP   |
| $A(t)$   | the measured fluorescence, assumed to be a measure of $M$         | NDP   |
| $F(t)$   | fibril concentration (similar to $\nu(t)$ )                       | TSKM  |
| $z_i(t)$ | number concentration of $i$ th aggregate (excluding oligomers)    | OPK   |

**Supplementary Table 3.** Parameters and their meanings in the various models. Abbreviations: NDP, nucleation dependent polymerization; FDSN, fibril-dependent secondary nucleation; TSKM, three-stage kinetic model; OPK, nucleation dependent model with off-pathway kinetics.

| Parameter  | meaning                                                      | model |
|------------|--------------------------------------------------------------|-------|
| $c_0$      | the initial IAPP monomer concentration                       | NDP   |
| $n_i$      | number of monomers added to $p_i$ to form $p_{i+1}$          | NDP   |
| $k$        | number of oligomer species                                   | NDP   |
| $f_i$      | forward rate constant for the $i$ th oligomer species        | NDP   |
| $f_k$      | forward rate constant for nuclei formation                   | NDP   |
| $f_{k+1}$  | forward rate constant for polymer elongation                 | NDP   |
| $b_i$      | reverse rate constant for the $i$ th oligomer species        | NDP   |
| $d_i$      | disintegration rate constant for the $i$ th oligomer species | NDP   |
| $\delta$   | rate of secondary nucleation                                 | FDSN  |
| $l_i$      | attachment rate of $i$ th oligomer to fibrils                | TSKM  |
| $s_i$      | detachment rate of $i$ th oligomer from fibrils              | TSKM  |
| $m$        | number of aggregate species (other than oligomers)           | OPK   |
| $\alpha_i$ | forward rate constant for the $i$ th aggregate species       | OPK   |
| $\beta_i$  | reverse rate constant for the $i$ th aggregate species       | OPK   |
| $b_\nu$    | reverse rate constant for nuclei                             | OPK   |
| $b_M$      | reverse rate constant for fibrils                            | OPK   |



## 3. Supplementary Figures

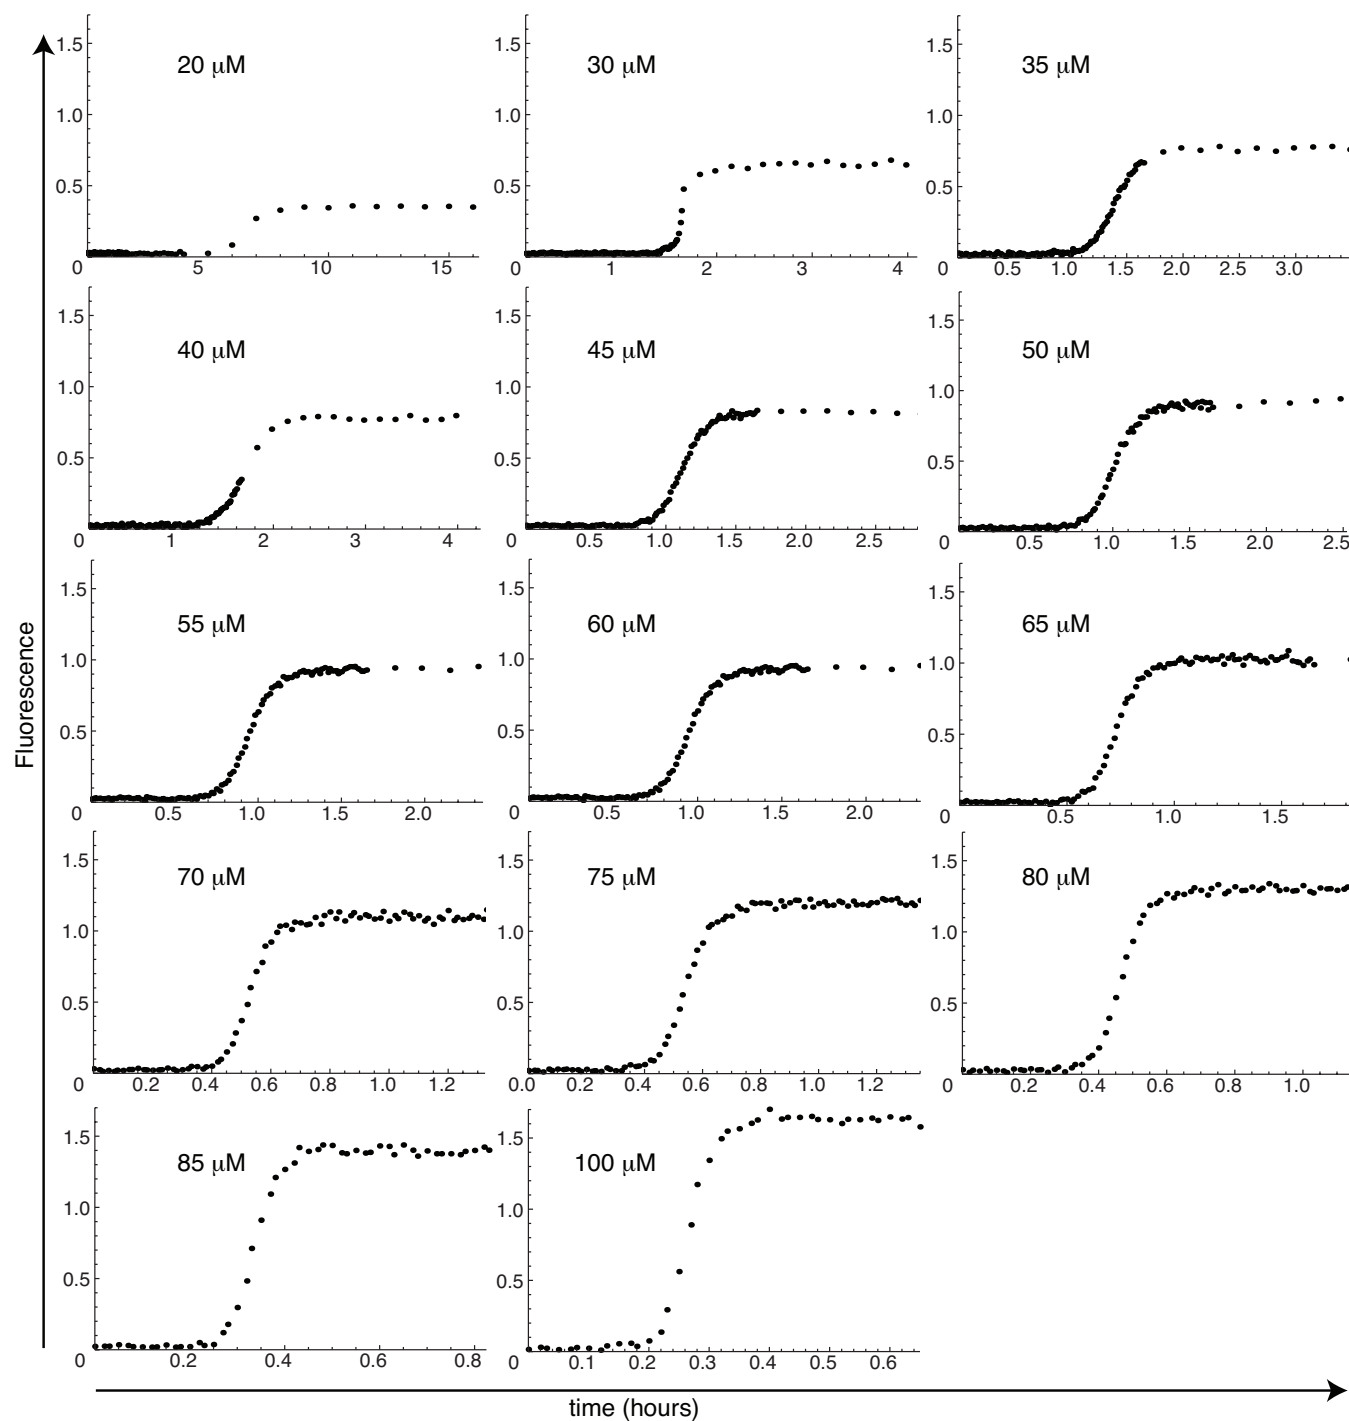

**Supplementary Figure 1.** All 14 sets of fluorescence data for hIAPP polymerization using the thioflavin-T assay. We collected 20 hours of data in each experiment but the range of data shown has been restricted in each case, for easier viewing.

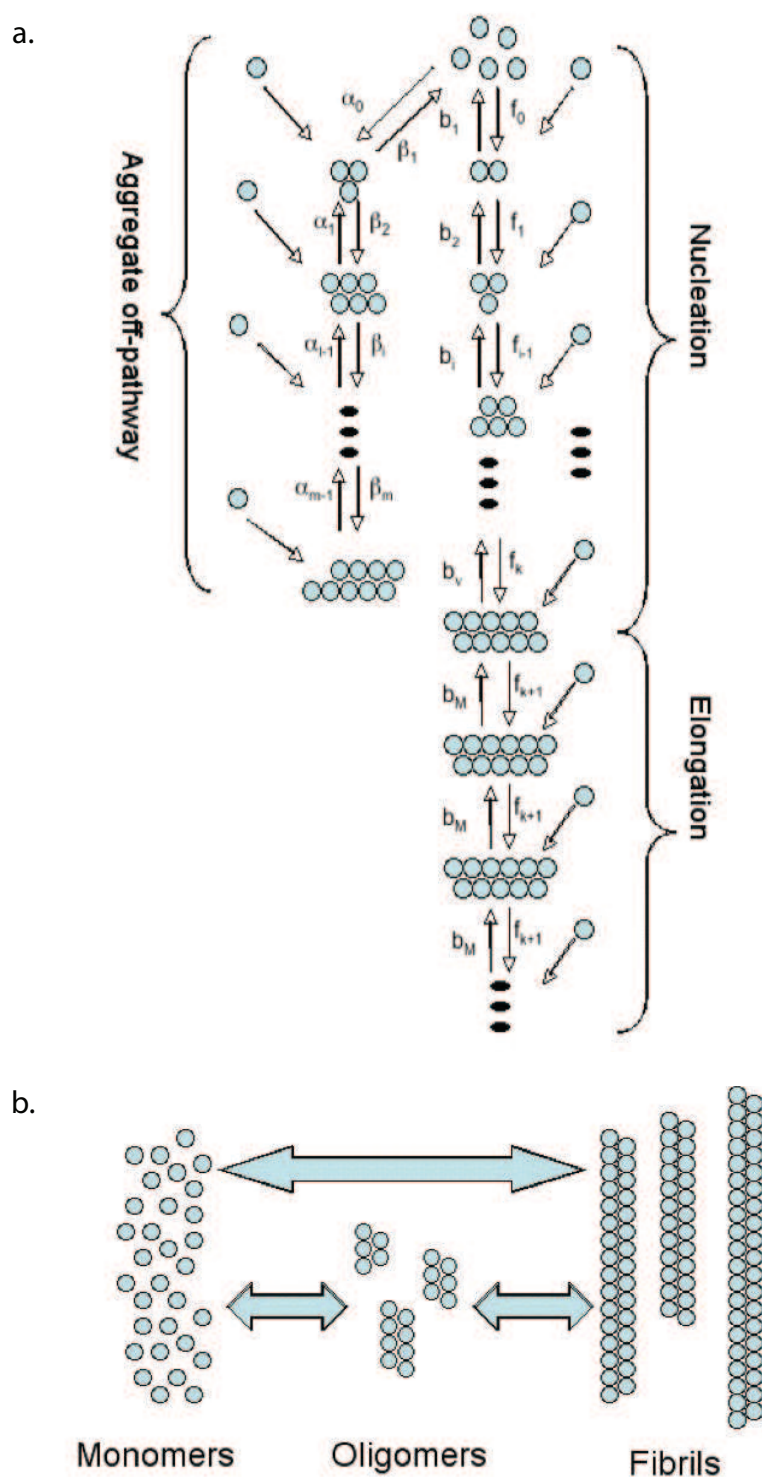

**Supplementary Figure 2.** Schematics of alternative models for amyloid nucleation and polymerization. a. the model proposed by Powers and Powers. b. the model proposed by Lee et al.
